# Supplementary material for: Jaw Bone Invasion of Oral Squamous Cell Carcinoma Is Associated with Osteoclast Count and Expression of Its Regulating Proteins in Patients and Organoids
Source: MDPI journal article supplement (doi:10.3390/jcm12186035), 2023-09-18
Supplement: s1 [file s1]

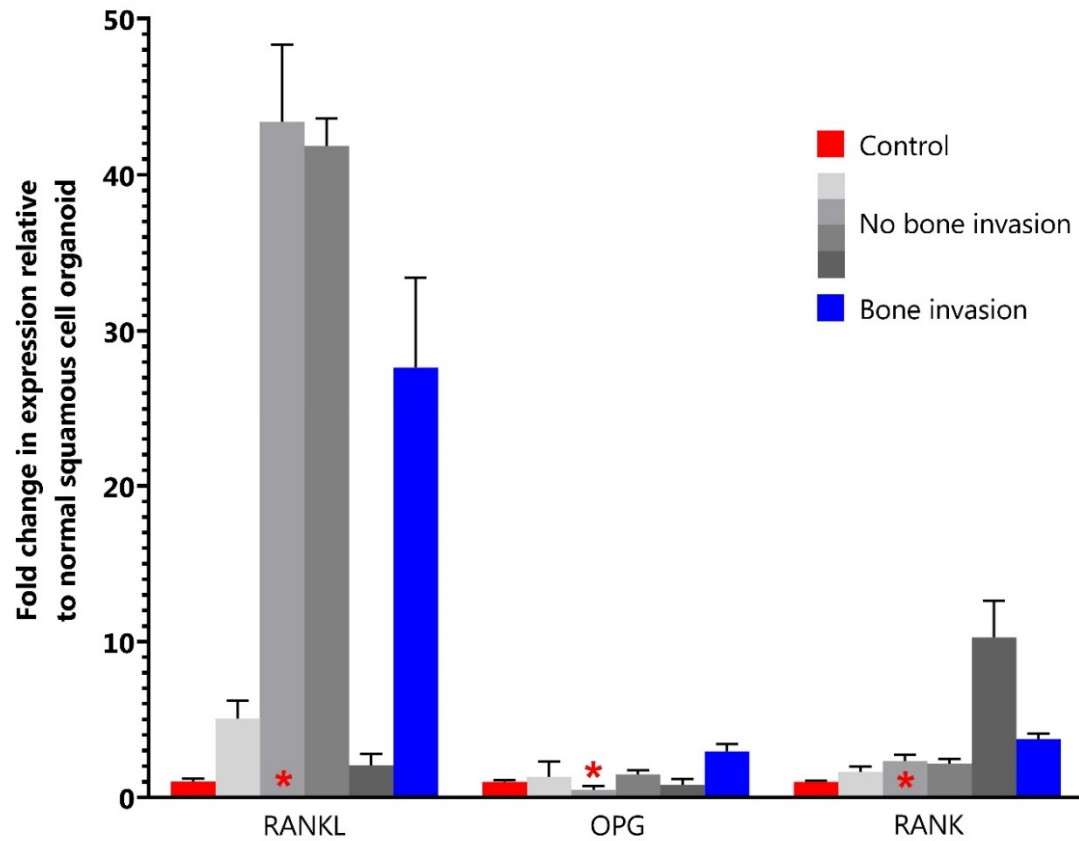

**Figure S1.** Results of 2<sup>nd</sup> quantitative PCR, \*indicates HPV positive organoid line. Red: indicates organoid line of wildtype tongue epithelium used as control; Blue: indicates organoid line with bone invasion; Grey: indicates 4 organoid lines without bone invasion.

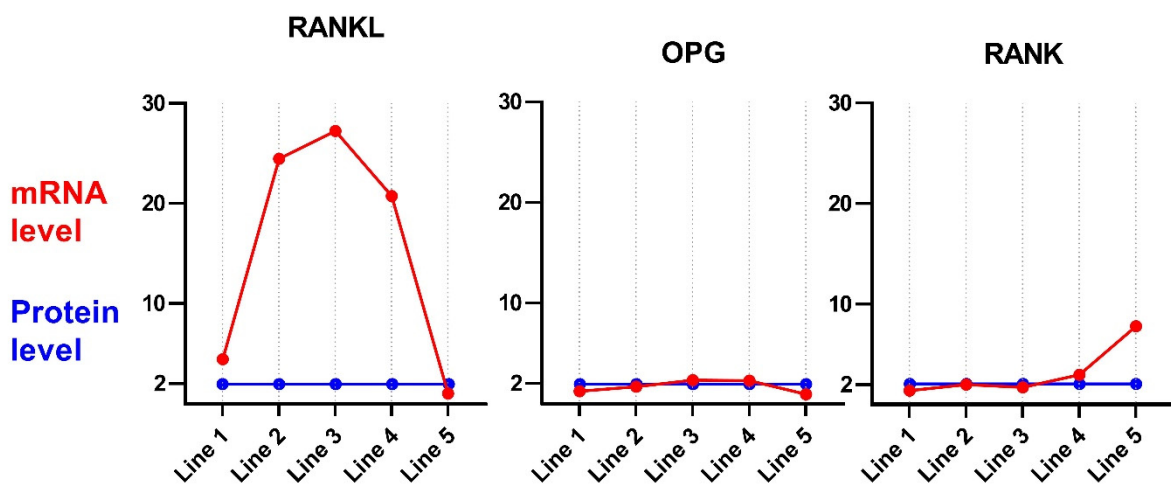

**Figure S2.** Protein versus mRNA expression, Immunohistochemical protein expression of RANKL, OPG and RANK was compared with mRNA expression assessed with qPCR.

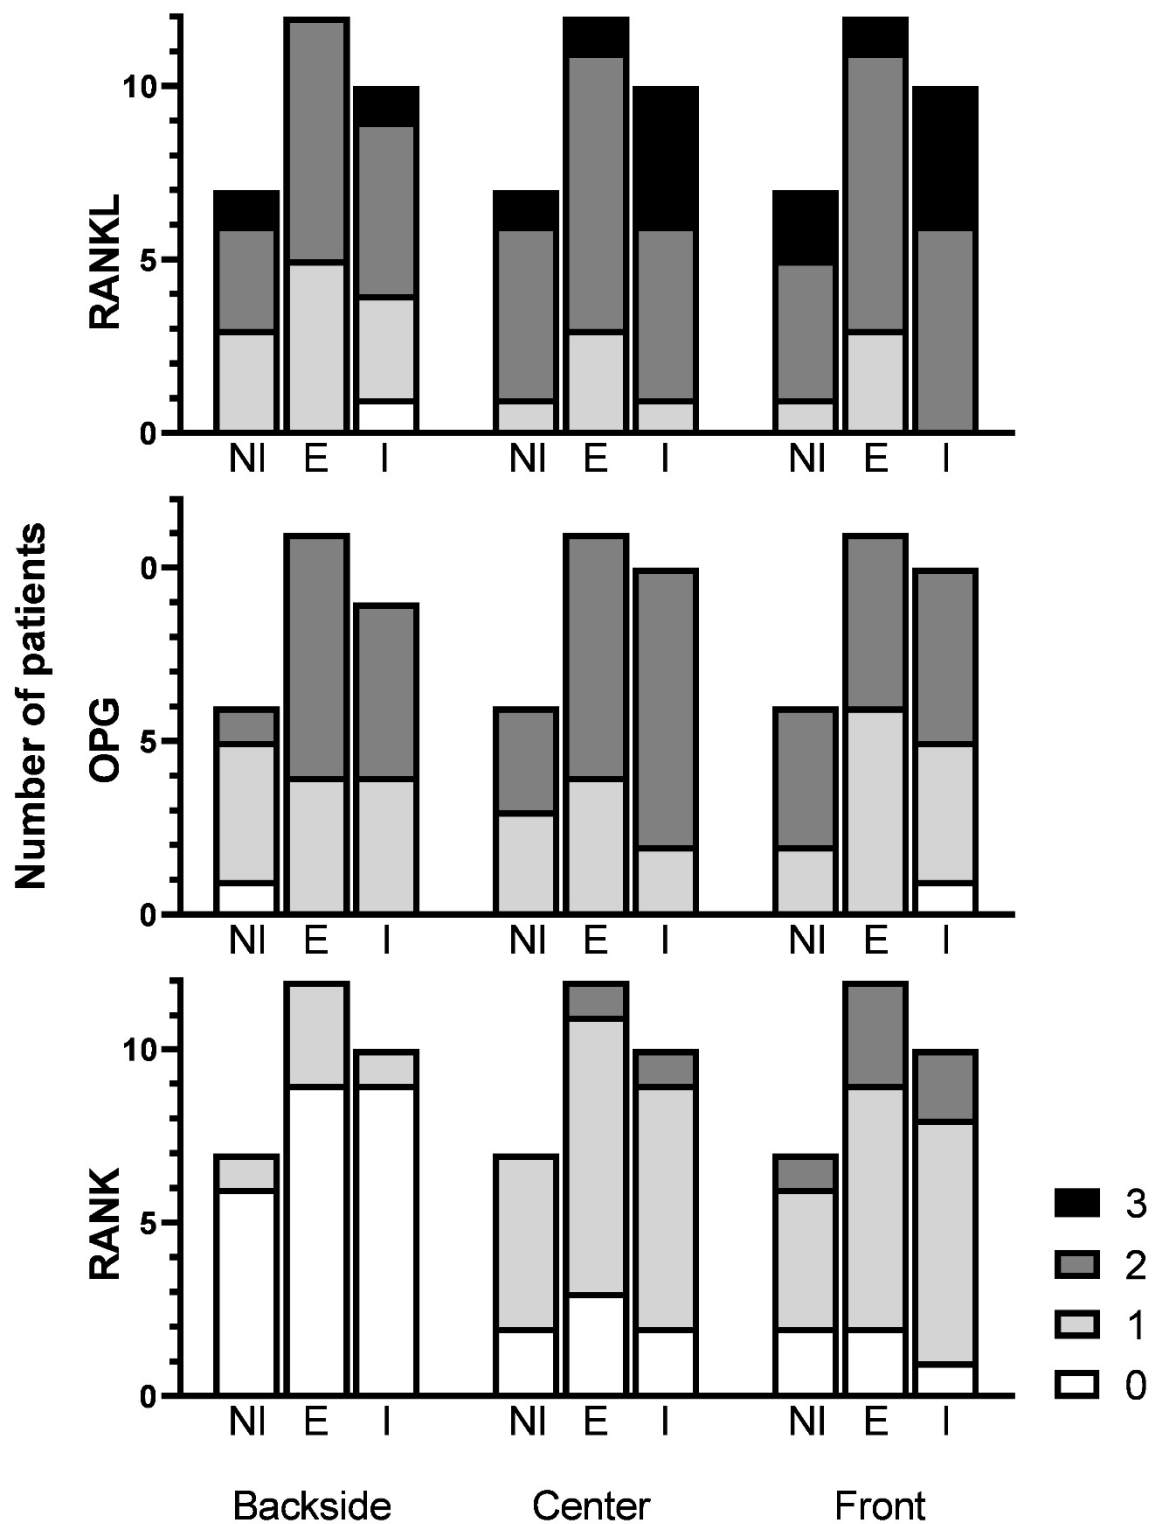

**Figure S3.** Differences in expression between patient groups per tumor side. Stacked bar charts of RANKL/OPG/RANK staining intensity score. Legend at the right displays color per staining intensity. X-axis displays three tumor sides with subdivision per patient group; NI: No Invasion, E: Erosion, I: Invasion. Y-axis displays number of patients. Groups were analyzed using Kruskal-Wallis H test, differences between groups were not statistically significant. Important note: RANKL intensity scored 0-3, OPG and RANK intensity scored 0-2.

**Table S1.** Primers for qPCR

| primer name           |           | primer sequence         | length of product |
|-----------------------|-----------|-------------------------|-------------------|
| Human RANKL(TNFSF11)  | Forward 1 | CAACATATCGTTGGATCACAGCA | 161               |
| Human RANKL(TNFSF11)  | Reverse 1 | GACAGACTCACTTTATGGGAACC |                   |
| Human RANKL(TNFSF11)  | Forward 2 | CCCATAAAGTGAGTCTGTCC    | 256               |
| Human RANKL(TNFSF11)  | Reverse 2 | CAATACTGGTGCTTCCTCC     |                   |
| Human OPG(TNFRSF11B)  | Forward 1 | CACAAATTGCAGTGTCTTTGGTC | 216               |
| Human OPG(TNFRSF11B)  | Reverse 1 | TCTGCGTTTACTTTGGTGCCA   |                   |
| Human OPG(TNFRSF11B)  | Forward 2 | GAAGGGCGCTACCTTGAGAT    | 102               |
| Human OPG(TNFRSF11B)  | Reverse 2 | GCAAACGTGATTTCGCTCTGG   |                   |
| Human RANK(TNFRSF11A) | Forward 1 | TCCTCCACGGACAAATGCAG    | 92                |
| Human RANK(TNFRSF11A) | Reverse 1 | CAAACCGCATCGGATTCTCT    |                   |
| Human RANK(TNFRSF11A) | Forward 2 | CACCAAATGAACCCCATGTTTAC | 182               |
| Human RANK(TNFRSF11A) | Reverse 2 | GGACTCCTTATCTCCACTTAGGC |                   |

**Table S2:** Differences in expression in tumor compared to expression in normal mucosa

| Friedman test |                      |                        | Multiple comparison with Bonferroni correction |                                   |                                     |
|---------------|----------------------|------------------------|------------------------------------------------|-----------------------------------|-------------------------------------|
|               | Test statistic       | p-value test statistic | Tumor front versus Normal mucosa               | Tumor center versus Normal mucosa | Tumor backside versus Normal mucosa |
| <b>RANKL</b>  |                      |                        |                                                |                                   |                                     |
| No invasion   | $\chi^2(3) = 12.60$  | 0.006                  | <b>0.013</b>                                   | <b>0.042</b>                      | 0.668                               |
| Erosion       | $\chi^2(3) = 17.855$ | <0.001                 | <b>0.004</b>                                   | <b>0.022</b>                      | 0.054                               |
| Invasion      | $\chi^2(3) = 17.468$ | 0.001                  | <b>0.003</b>                                   | <b>0.016</b>                      | 1.000                               |
| <b>OPG</b>    |                      |                        |                                                |                                   |                                     |
| No invasion   | $\chi^2(3) = 6.480$  | 0.09                   | *                                              | *                                 | *                                   |
| Erosion       | $\chi^2(3) = 3.766$  | 0.288                  | *                                              | *                                 | *                                   |
| Invasions     | $\chi^2(3) = 10.705$ | 0.013                  | 0.877                                          | 0.061                             | 0.152                               |
| <b>RANK</b>   |                      |                        |                                                |                                   |                                     |
| No invasion   | $\chi^2(3) = 7.235$  | 0.065                  | *                                              | *                                 | *                                   |
| Erosion       | $\chi^2(3) = 19.857$ | <0.001                 | <b>0.015</b>                                   | 0.116                             | 1.000                               |
| Invasion      | $\chi^2(3) = 7.174$  | 0.067                  | *                                              | *                                 | *                                   |

**Table S2:** Statistical testing of RANKL/OPG/RANK expression comparing tumor front, tumor center and tumor backside with expression in normal mucosa. As the expression score is ordinal data and expression is compared within a patient, the non-parametric Friedman's test was used. If the Friedman's test was statistically significant, multiple comparison with Bonferroni correction was executed. A p-value of  $\leq 0.05$  was interpreted as statistical significant and is displayed in bold.

**Table S3:** Differences in expression within tumor

| Friedman test |                      |                        | Multiple comparison with Bonferroni correction |                                    |                                 |
|---------------|----------------------|------------------------|------------------------------------------------|------------------------------------|---------------------------------|
|               | Test statistic       | p-value test statistic | Tumor front versus Tumor backside              | Tumor center versus Tumor backside | Tumor front versus Tumor center |
| <b>RANKL</b>  |                      |                        |                                                |                                    |                                 |
| No invasion   | $\chi^2(2) = 2.333$  | 0.311                  | *                                              | *                                  | *                               |
| Erosion       | $\chi^2(2) = 2.571$  | 0.276                  | *                                              | *                                  | *                               |
| Invasion      | $\chi^2(2) = 10.571$ | 0.005                  | <b>0.042</b>                                   | 0.076                              | 1.000                           |
| <b>OPG</b>    |                      |                        |                                                |                                    |                                 |
| No invasion   | $\chi^2(2) = 2.947$  | 0.229                  | *                                              | *                                  | *                               |
| Erosion       | $\chi^2(2) = 4.000$  | 0.135                  | *                                              | *                                  | *                               |
| Invasions     | $\chi^2(2) = 2.273$  | 0.321                  | *                                              | *                                  | *                               |
| <b>RANK</b>   |                      |                        |                                                |                                    |                                 |
| No invasion   | $\chi^2(2) = 7.538$  | 0.023                  | 0.247                                          | 0.425                              | 1.000                           |
| Erosion       | $\chi^2(2) = 13.923$ | 0.001                  | <b>0.024</b>                                   | 0.157                              | 1.000                           |
| Invasion      | $\chi^2(2) = 14.000$ | 0.001                  | <b>0.016</b>                                   | 0.076                              | 1.000                           |

**Table S3:** Statistical testing of RANKL/OPG/RANK expression comparing tumor front, tumor center and tumor backside. As the expression score is ordinal data and expression is compared within a patient, the non-parametric Friedman's test was used. If the Friedman's test was statistically significant, multiple comparison with Bonferroni correction was executed. A p-value of  $\leq 0.05$  was interpreted as statistical significant and is displayed in bold.

**Table S4:** Differences in expression between patient groups per tumor side

|                | Mean Rank   |         |          | Kruskal Wallis Test |         |
|----------------|-------------|---------|----------|---------------------|---------|
|                | No invasion | Erosion | Invasion | Test statistic      | p-value |
| <b>RANKL</b>   | N=7         | N=12    | N=10     |                     |         |
| Tumor-front    | 15.50       | 11.79   | 18.50    | 4.587               | 0.101   |
| Tumor-center   | 14.57       | 12.63   | 18.15    | 3.102               | 0.212   |
| Tumor-Backside | 15.64       | 14.58   | 15.05    | 0.085               | 0.958   |
| <b>OPG</b>     | N=6         | N=11    | N=10     |                     |         |
| Tumor-front    | 16.17       | 13.41   | 13.35    | 0.743               | 0.690   |
| Tumor-center   | 11.75       | 13.59   | 15.80    | 1.536               | 0.464   |
| Tumor-backside | 8.50        | 15.45   | 14.44    | 4.397               | 0.111   |
| <b>RANK</b>    | N=7         | N=12    | N=10     |                     |         |
| Tumor-front    | 12.93       | 15.58   | 15.75    | 0.733               | 0.693   |
| Tumor-center   | 13.64       | 15.04   | 15.90    | 0.440               | 0.802   |
| Tumor-backside | 14.57       | 16.13   | 13.95    | 0.885               | 0.642   |

**Table S4:** Statistical testing of RANKL/OPG/RANK expression comparing patient groups; no invasion, erosion and invasion per tumor side (tumor front, tumor center and tumor backside). As the expression score is ordinal data and expression is compared from different patients, the non-parametric Kruskal-Wallis H test was used. As none of these tests were statistically significant, post-hoc testing was not executed. A p-value of  $\leq 0.05$  was interpreted as statistical significant and is displayed in bold.
